# Supplementary material for: Consumers’ Views on the Importance of Specific Front-of-Pack Nutrition Information: A Latent Profile Analysis
Source: Nutrients. 2019 May 23;11(5):1158. doi: 10.3390/nu11051158 (PMC6566345; doi:10.3390/nu11051158)
Supplement: Supplementary file 1 [file nutrients-11-01158-s001.pdf]

Table S1. The  $p$ -values of pairwise comparisons of each of the indicator variables between segments.

[illegible]
